# Supplementary material
Source: PubMed Central journal article supplement (PMC3542232)
Supplement: cbt-13-1417-s01.pdf [file cbt-13-1417-s01.pdf]

## **Supplemental Material to:**

**Christopher Fung, Xing Chen, Jennifer R. Grandis and  
Umamaheswar Duvvuri**

**EGFR tyrosine kinase inhibition induces autophagy in  
cancer cells**

**Cancer Biology & Therapy 2012; 13(14)**

**<http://dx.doi.org/10.4161/cbt.22002>**

**<http://www.landesbioscience.com/journals/cbt/article/22002/>**

**S1****Hela-R30****P-Erk 1/2**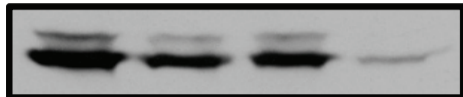**Erk 1/2**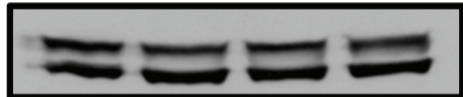 **$\beta$ -Tubulin**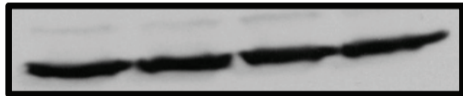**Erlotinib (10  $\mu$ M)****-                    -                    +                    +****Rapamycin (100 nM)****-                    +                    -                    +**

**Figure S1.** Rapamycin and erlotinib cotreatment of EGFR-TKI cells reduces ERK phosphorylation. HeLa-R30 cells were treated with 10  $\mu$ M erlotinib, 100 nM rapamycin or both 10  $\mu$ M erlotinib and 100 nM rapamycin for 24 hours. Whole cell lysates were immunoblotted for ERK and phospho-ERK as well as  $\beta$ -tubulin. Both rapamycin alone and erlotinib alone reduced ERK phosphorylation while cotreatment with both rapamycin and erlotinib significantly reduced ERK phosphorylation.
